# Supplementary material for: Integrative x-ray structure and molecular modeling for the rationalization of procaspase-8 inhibitor potency and selectivity
Source: bioRxiv or medRxiv preprint supplement (doi:10.1101/721951), 2019-08-05
Supplement: Supplementary file [file media-1.pdf]

Supplemental information for:

## Integrative x-ray structure and molecular modeling for the rationalization of procaspase-8 inhibitor potency and selectivity

Janice H. Xu<sup>1,2</sup>, Jerome Eberhardt<sup>2</sup>, Brianna Hill-Payne<sup>4</sup>, Gonzalo E. González-Páez<sup>1,2</sup>, José Omar Castellón<sup>4</sup>, Benjamin F. Cravatt<sup>3</sup>, Stefano Forli<sup>2\*</sup>, Dennis W. Wolan<sup>1,2\*</sup>, Keriann M. Backus<sup>4\*</sup>

<sup>1</sup> Department of Molecular Medicine, <sup>2</sup> Department of Structural and Computational Biology, <sup>3</sup> Department of Chemistry, The Scripps Research Institute, CA 92037, USA

<sup>4</sup> Departments of Biological Chemistry and Chemistry and Biochemistry, David Geffen School of Medicine, University of California, Los Angeles, CA 90095, USA

\*Corresponding Authors: forli@scripps.edu, wolan@scripps.edu, and kbackus@mednet.ucla.edu

### Table of Contents

- S2** **Supplementary Table 1.** X-ray data collection and structure refinement statistics of procaspase-8 in complex with **63-R**.
- S3** **Supplementary Fig. 1.** Overlay of pro- and active caspase-8 loops 1 and 2.
- S4** **Supplementary Fig. 2.** Simulated-annealing omit map density for **63-R**.
- S5** **Supplementary Table 2.** Modification of procaspase-8 crystals by **63-R**.
- S6** **Supplementary Fig. 3.** Competitive ABPP gels of the W420A and H264A mutated forms of procaspase-8.
- S7** **Supplementary Fig. 4.** Circular dichroism and immunoblot data of procaspase-8 mutants.
- S8** **Supplementary Fig. 5.** Representative full-length gels for competitive labeling experiments.
- S8** **Supplementary Fig. 6.** Calculated apparent IC<sub>50</sub> for labeling of procaspase-8 mutations by **63-R** and **7**.
- S10** **Supplementary Fig. 7.** Representative full-length gels for IC<sub>50</sub> competitive labeling experiments.
- S11** **Supplementary References**

**Supplementary Table 1.** X-ray data collection and structure refinement statistics of procaspase-8 in complex with **63-R**.

|                                                   |                       |
|---------------------------------------------------|-----------------------|
| <b>Structure</b>                                  | 6PX9                  |
| Space group                                       | P 3 <sub>1</sub>      |
| Cell dimensions                                   |                       |
| a, b, c; Å                                        | 101.3, 101.3, 175.5   |
| α, β, γ; °                                        | 90, 90, 120           |
| Data Processing                                   |                       |
| Resolution, Å (outer shell)                       | 50.0-2.88 (2.93-2.88) |
| Completeness, %                                   | 99.5 (99.5)           |
| Unique reflections                                | 45,476 (2,243)        |
| Redundancy                                        | 4.5 (4.4)             |
| R <sub>meas</sub> (%) <sup>a</sup>                | 33.6 (150)            |
| R <sub>merge</sub> (%) <sup>b</sup>               | 29.7 (132)            |
| R <sub>p.i.m.</sub> (%) <sup>c</sup>              | 15.6 (70.5)           |
| Average I / Average σ (I)                         | 8.1 (1.7)             |
| CC <sub>1/2</sub>                                 | 67.9 (17.4)           |
| <b>Refinement</b>                                 |                       |
| Resolution, Å (outer shell)                       | 50.0-2.88 (2.94-2.88) |
| No. reflections (test set) <sup>d</sup>           | 45,343 (2,253)        |
| R <sub>cryst</sub> (%) <sup>e</sup>               | 28.9 (44.2)           |
| R <sub>free</sub> (%)                             | 36.6 (49.4)           |
| Protein atoms / Waters                            | 9,845 / 4 / 30        |
| CV coordinate error (Å) <sup>f</sup>              | 0.90                  |
| RMSD bonds (Å) / angles °                         | 0.003 / 0.677         |
| B-values protein/waters/ligands (Å <sup>2</sup> ) | 44 / 39 / 43          |
| Ramachandran Statistics (%)                       |                       |
| Preferred                                         | 89.2                  |
| Allowed                                           | 10.8                  |
| Outliers                                          | 0                     |

<sup>a</sup> $R_{meas} = \{\sum_{hkl}[N/(N-1)]^{1/2}\sum_i |I_{i(hkl)} - \langle I_{(hkl)} \rangle| / \sum_{hkl} \sum_i I_{i(hkl)}\}$ , where  $I_{i(hkl)}$  are the observed intensities,  $\langle I_{(hkl)} \rangle$  are the average intensities and  $N$  is the multiplicity of reflection  $hkl$ . <sup>b</sup> $R_{merge} = \sum_{hkl} \sum_i |I_{i(hkl)} - \langle I_{(hkl)} \rangle| / \sum_{hkl} \sum_i I_{i(hkl)}$  where  $I_{i(hkl)}$  is the  $i^{\text{th}}$  measurement of reflection  $h$  and  $\langle I_{(hkl)} \rangle$  is the average measurement value. <sup>c</sup> $R_{p.i.m.}$  (precision-indicating  $R_{merge}$ ) =  $\sum_{hkl} [1/(N_{hkl} - 1)]^{1/2} \sum_i |I_{i(hkl)} - \langle I_{(hkl)} \rangle| / \sum_{hkl} \sum_i I_{i(hkl)}$ . <sup>d</sup>Reflections with  $I > 0$  were used for refinement<sup>1-3</sup>. <sup>e</sup> $R_{cryst} = \sum_h |F_{obs} - F_{calc}| / \sum |F_{obs}|$ , where  $F_{obs}$  and  $F_{calc}$  are the calculated and observed structure factor amplitudes, respectively.  $R_{free}$  is  $R_{cryst}$  with 5.0% test set structure factors. <sup>f</sup>Cross-validated (CV) Luzzati coordinate errors.

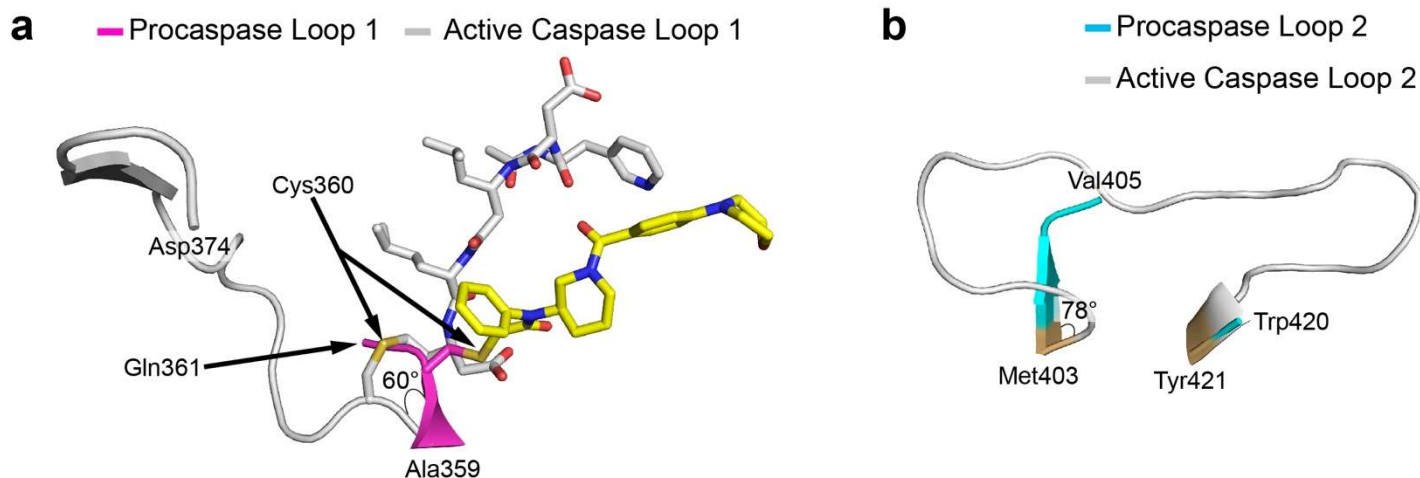

**Supplementary Fig. 1.** Overlay of pro- and active caspase-8 loops 1 and 2. **a** Cartoon representation of the N-terminal end of loop 1 where the catalytic Cys360 of active caspase-8 repositions  $60^\circ$  from Cys360 in the procaspase-8 structure (carbons are magenta, grey, yellow, and green for procaspase-8, active caspase-8, **63-R**, and active caspase-8 peptide inhibitor respectively, with blue nitrogens, and red oxygens). **b** Cartoon representation of loop 2 where procaspase-8 is cyan and active caspase-8 is grey. Met403 is shifted  $78^\circ$  in the activated caspase-8, changing the secondary structure of loop 2 from the  $\beta$ -sheet seen in procaspase-8 into a disordered loop.

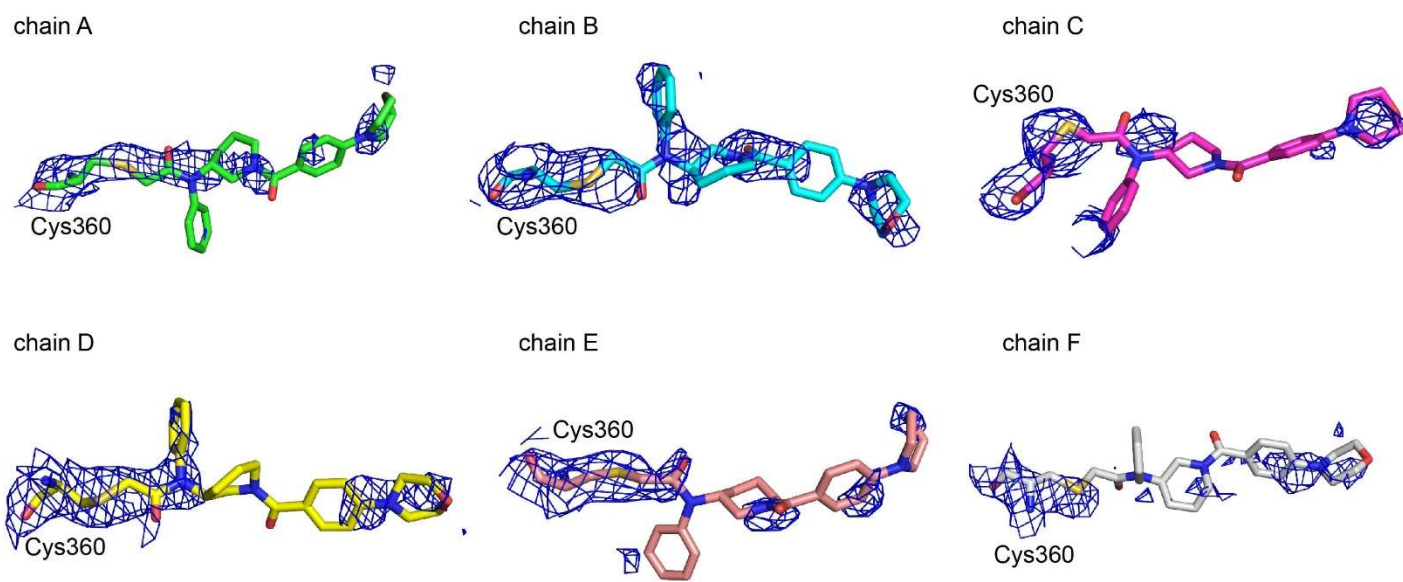

**Supplementary Fig. 2.** Simulated-annealing omit map density contoured at  $1.0\sigma$  of catalytic Cys360 bound to inhibitor **63-R** in all 6 subunits. Atoms colored as Supplementary Fig. 1.

**Supplementary Table 2.** Modification of procaspase-8 crystals by **63-R**. Crystals from procaspase-8 co-crystallized with **63-R** were harvested, reduced, alkylated, subjected to trypsin digest and analyzed by LC-MS/MS. Underline marks the **63-R**-modified cysteine.

| Protein | Cysteine | Fragment # | Peptide                     | M+H<br>calculated<br>(m/z) | M+H<br>observed<br>(m/z) | Charge |
|---------|----------|------------|-----------------------------|----------------------------|--------------------------|--------|
| CASP8   | C360     | 63-R       | K.VFFIQAC <u>Q</u> GDNYQK.G | 1034.99                    | 1034.99                  | +2     |

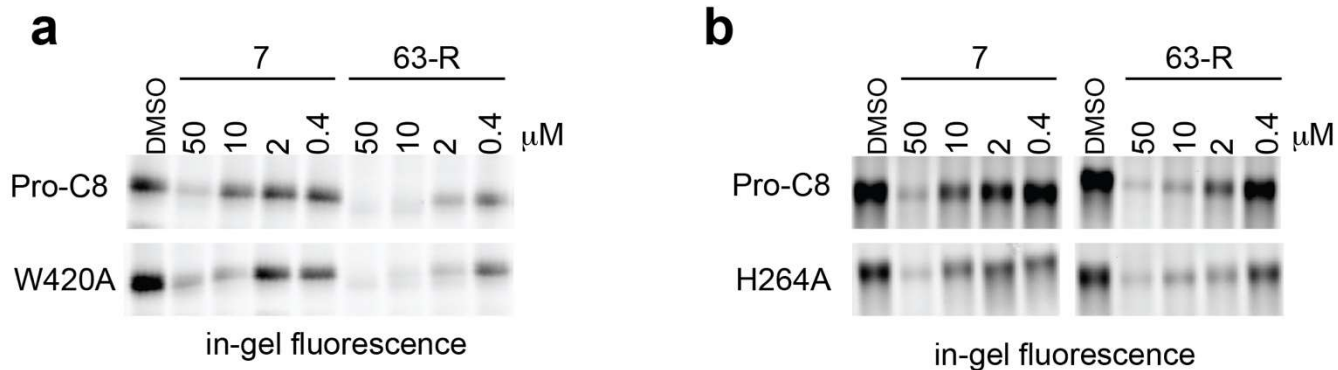

**Supplementary Fig. 3.** Competitive ABPP gels of the W420A and H264A mutated forms of procaspase-8. **a** Recombinant procaspase-8 (D384A and D394A), and mutant procaspase-8 proteins (W420A) were added to HEK 293T soluble lysates to a final protein concentration of 500 nM. The protein-containing lysates were then treated with **7** or **63-R** at the indicated concentrations or vehicle (DMSO) for 1h, followed by labeling with **61** (10  $\mu$ M) for 1h, “click” conjugation to rhodamine-azide, and analysis by SDS-PAGE and in-gel fluorescence. **b** As in ‘a’ but with the H264A mutant of procaspase-8. Due to observed instability of the H264A protein upon multiple freeze thaw cycles, the protein was assayed in *E coli* lysates after overexpression without freezing and without further purification.

**a**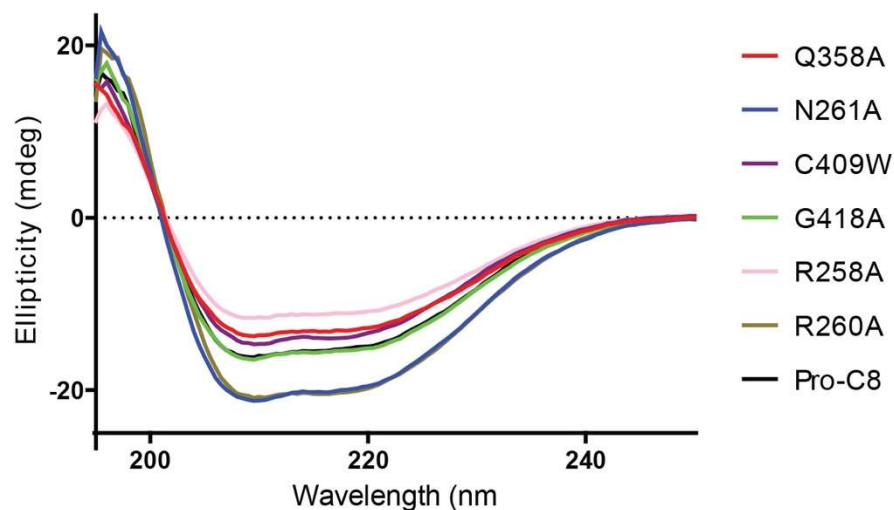

|        | Alpha Helix | Beta Sheet | Turn  | Other |
|--------|-------------|------------|-------|-------|
| Pro-C8 | 15.9%       | 38.3%      | 13.9% | 33.4% |
| R260A  | 15.3%       | 42.5%      | 14.9% | 29.3% |
| Q358A  | 15.0%       | 42.5%      | 13.9% | 30.6% |
| G418A  | 15.1%       | 38.5%      | 11.1% | 36.5% |
| C409W  | 14.6%       | 40.2%      | 12.0% | 34.0% |
| R258A  | 15.9%       | 36.9%      | 13.5% | 34.8% |
| N261A  | 15.4%       | 42.5%      | 13.4% | 30.1% |

**b**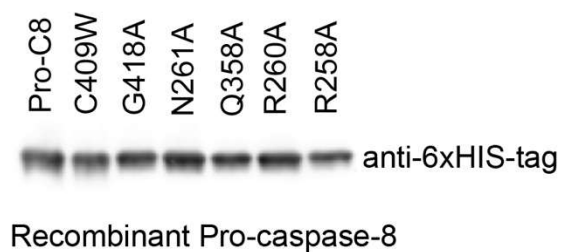

**Supplementary Fig. 4. a** Circular dichroism spectra and calculated secondary structures of caspase-8 mutant proteins. **b** Relative abundance of the indicated recombinant procaspase-8 constructs was visualized by Western blot with an anti-his antibody.

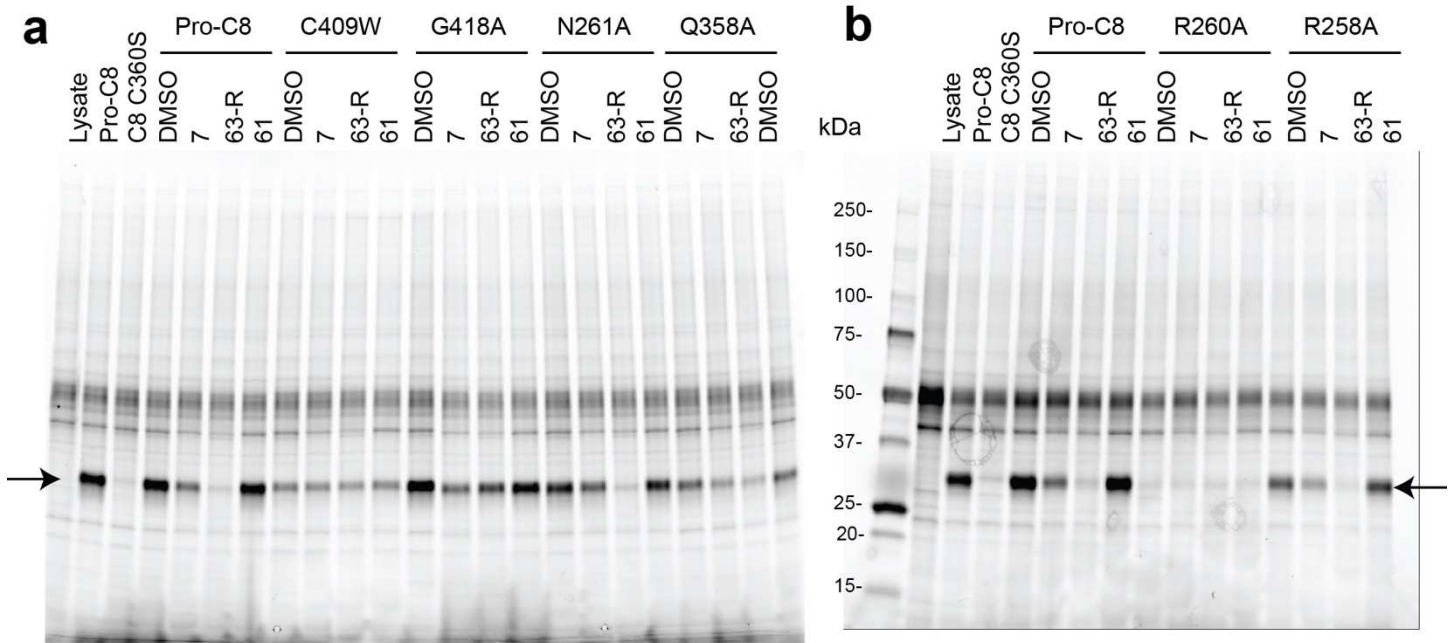

**Supplementary Fig. 5.** Representative full-length gels for single dose competitive labeling experiments quantified in Fig. 5B-I. **a** Recombinant procaspase-8 (D384A and D394A), and mutant procaspase-8 proteins (C409W, G418A, N261A, or Q358A) were added to HEK 293T soluble lysates to a final protein concentration of 500 nM. The protein-containing lysates were then treated with **7**, **63-R**, **62** (all at 10  $\mu$ M), or vehicle (DMSO) for 1h, followed by labeling with **61** (10  $\mu$ M) for 1h, “click” conjugation to rhodamine-azide, and analysis by SDS-PAGE and in-gel fluorescence. Note that the C360S-mutant of procaspase-8, which lacks the catalytic cysteine, did not label with **61**. **b** As in ‘a’ but with the R260A- and R258A-mutants of procaspase-8. Arrows indicate procaspase-8 band.



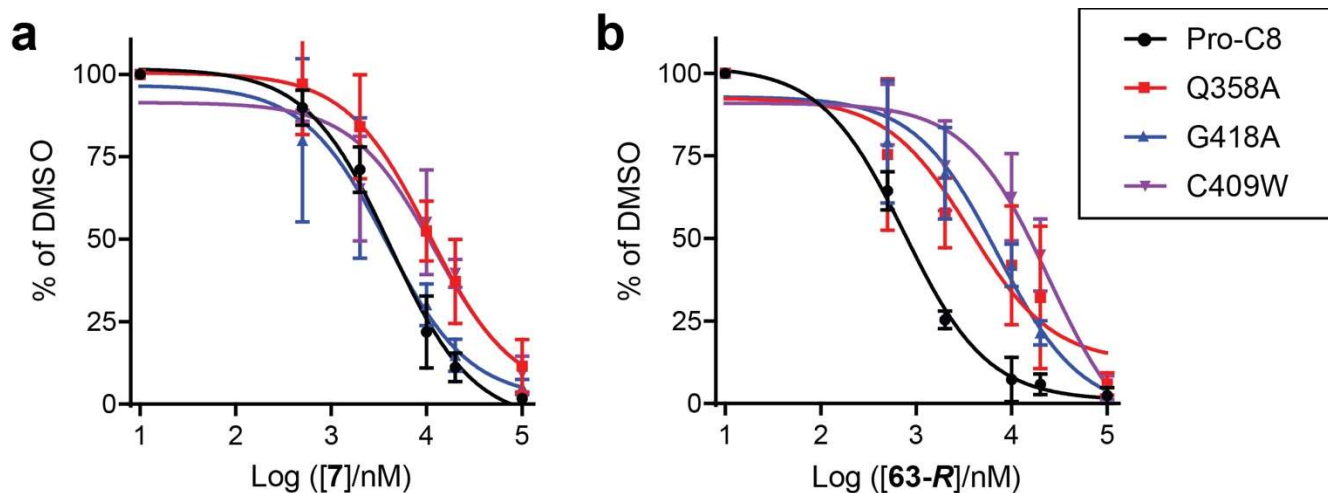

| Compound                       | Pro-C8    |           | C409W      |             | G418A     |            | Q358A      |            |
|--------------------------------|-----------|-----------|------------|-------------|-----------|------------|------------|------------|
|                                | 7         | 63-R      | 7          | 63-R        | 7         | 63-R       | 7          | 63-R       |
| Apparent IC <sub>50</sub> (μM) | 4.10      | 0.75      | 12.18      | 24.59       | 3.80      | 7.14       | 10.59      | 3.64       |
| 95% CI (μM)                    | 2.94–5.80 | 0.62–0.94 | 3.37–32.80 | 10.53–63.83 | 1.55–9.13 | 3.12–14.70 | 5.15–20.85 | 0.63–24.98 |

**Supplementary Fig. 6.** Site-directed mutagenesis studies to identify residues that determine compound binding to procaspase-8. (a and b) Apparent IC<sub>50</sub> curves for blockade of **61** labeling of procaspase-8 (pro-C8) harboring the indicated mutations by pre-treatment with **7** (a) or **63-R** (b). c Calculated apparent IC<sub>50</sub> values, including 95% confidence intervals derived from the three replicate experiments shown in a and b.

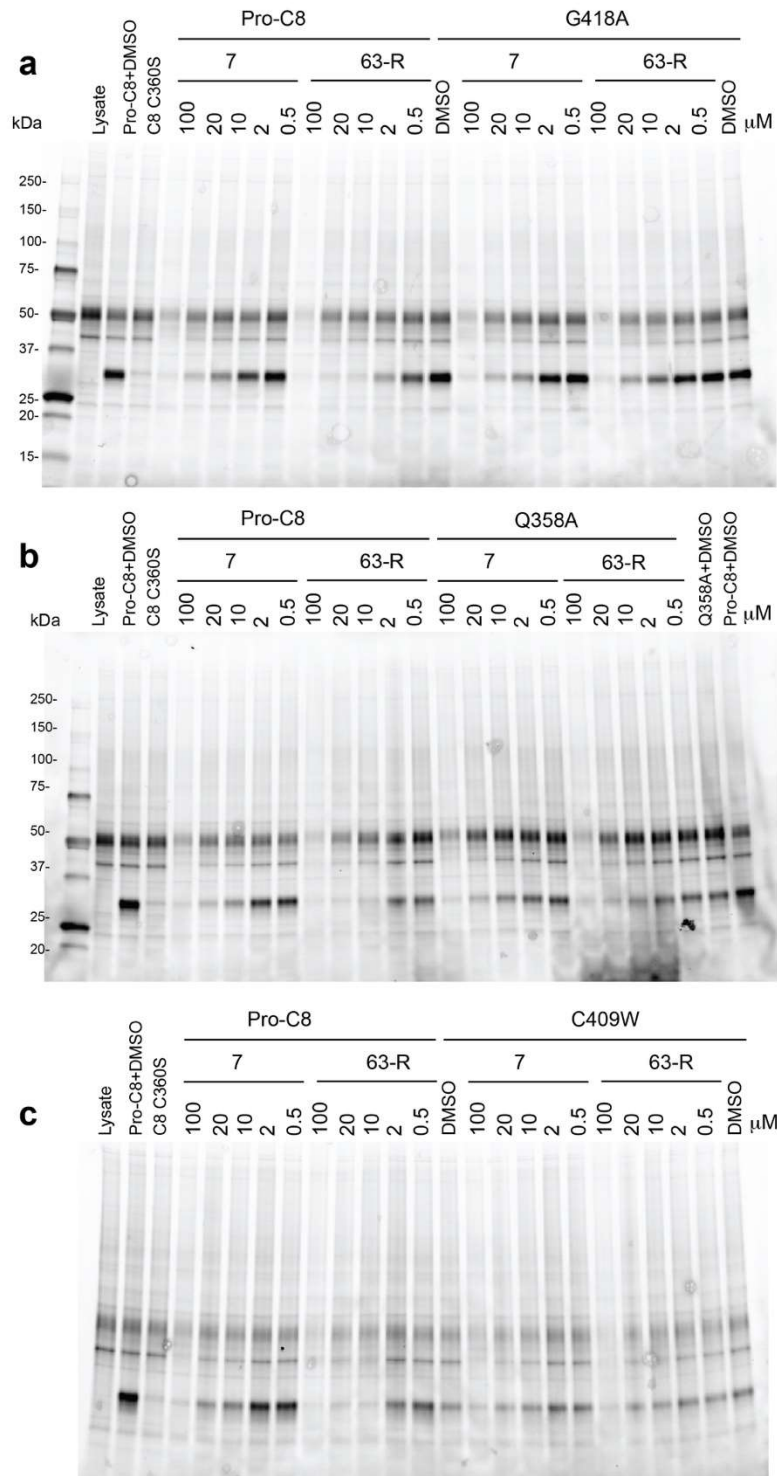

**Supplementary Fig. 7.** Representative full-length gels for IC<sub>50</sub> competitive labeling experiments quantified in Fig. 5J and Fig. 5 supplement 3. **a** Recombinant procaspase-8 (D384A and D394A), and C409W-mutant procaspase-8 were added to HEK 293T soluble lysates to a final protein concentration of 500 nM. The protein-containing lysates were then treated with **7**, **63-R**, **62** at the indicated concentrations, or vehicle (DMSO) for 1h, followed by labeling with **61** (10 μM) for 1h, “click” conjugation to rhodamine-azide. **b** as in ‘a’, with Q358A-mutant pro-caspase-8. **c** as in ‘a’, with C409W-mutant procaspase-8.

## Supplementary References

1. Weiss, M. S. Global indicators of X-ray data quality. *J. Appl. Crystallogr.* **34**, 130–135 (2001).
2. Weiss, M. S. & Hilgenfeld, R. On the use of the merging R factor as a quality indicator for X-ray data. *J. Appl. Crystallogr.* **30**, 203–205 (1997).
3. Karplus, P. A. & Diederichs, K. Assessing and maximizing data quality in macromolecular crystallography. *Curr. Opin. Struct. Biol.* **34**, 60–68 (2015).
